# Supplementary material for: Three Prime Repair Exonuclease 1 preferentially degrades the integration-incompetent HIV-1 DNA through favorable kinetics, thermodynamic, structural and conformational properties
Source: PubMed Central journal article supplement — bioRxiv. 2024 Mar 19:2024.03.19.585766. Preprint. [Version 1] doi: 10.1101/2024.03.19.585766 (PMC10983988; doi:10.1101/2024.03.19.585766), 2024-03-19
Supplement: media-1.pdf [file media-1.pdf]

## Supplementary Figures

**Figure 1:** Representative Initial velocity curve analysis of h-TREX1 kinetics with U5 unprocessed and processed HIV-1 substrates

(a)

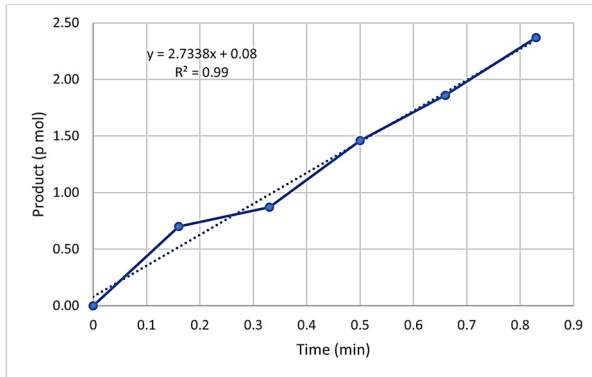

**h-TREX1 with 50 nM U5 unprocessed HIV-1 DNA substrate**

(d)

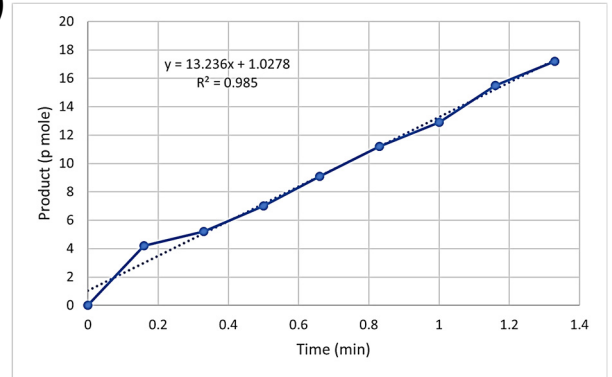

**h-TREX1 with 300 nM U5 unprocessed HIV-1 DNA substrate**

(b)

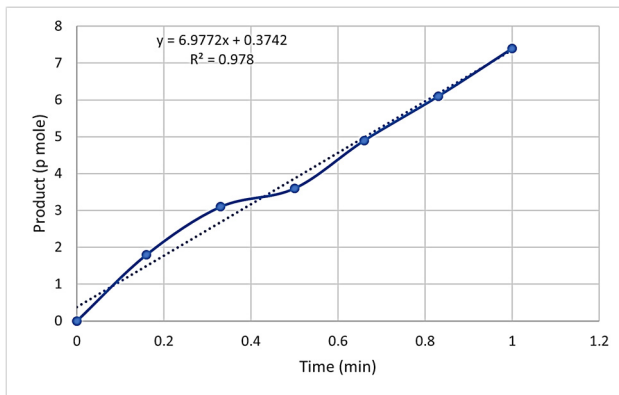

**h-TREX1 with 100 nM U5 unprocessed HIV-1 DNA substrate**

(e)

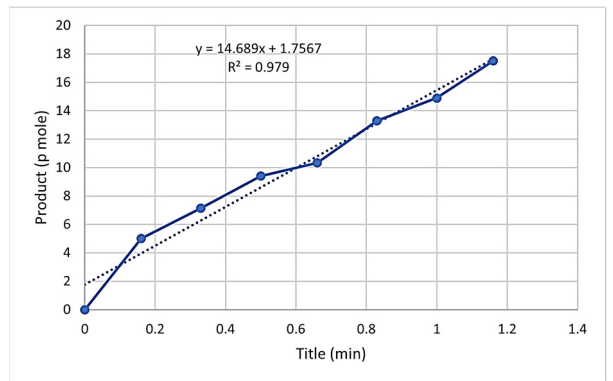

**h-TREX1 with 400 nM U5 unprocessed HIV-1 DNA substrate**

(c)

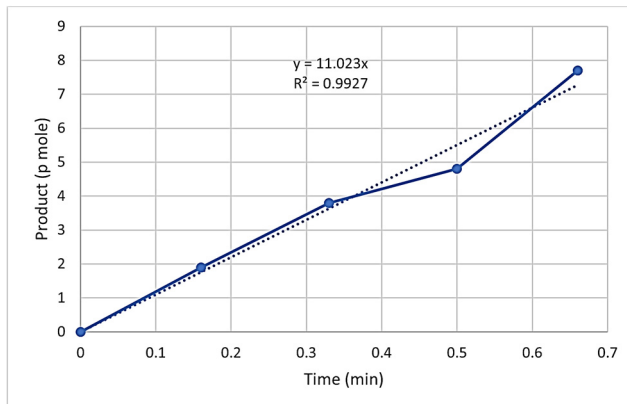

**h-TREX1 with 200 nM U5 unprocessed HIV-1 DNA substrate**

(f)

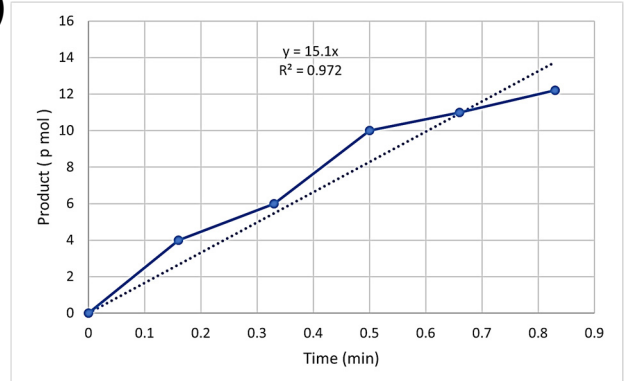

**h-TREX1 with 800 nM U5 unprocessed HIV-1 DNA substrate**

(g)

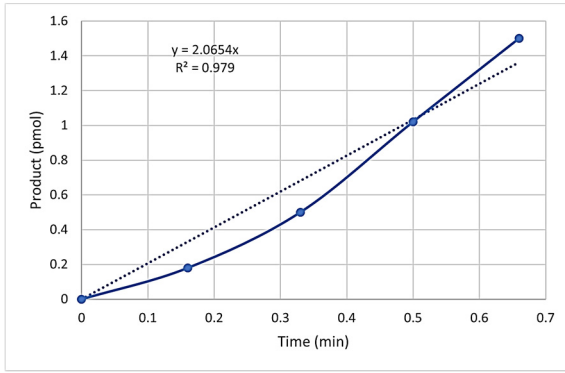

**h-TREX1 with 10 nM U5 Processed HIV-1 DNA substrate**

(i)

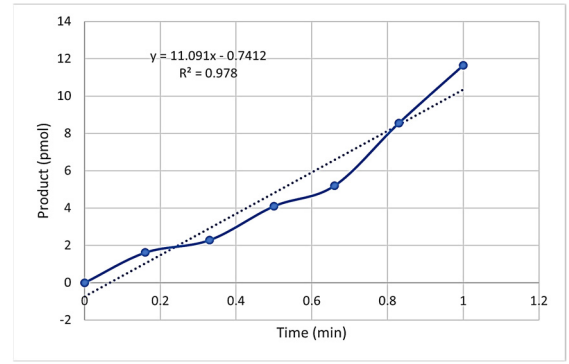

**h-TREX1 with 100 nM U5 Processed HIV-1 DNA substrate**

(h)

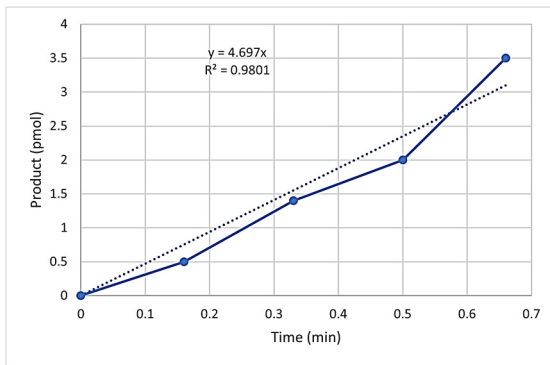

**h-TREX1 with 50 nM U5 Processed HIV-1 DNA substrate**

(j)

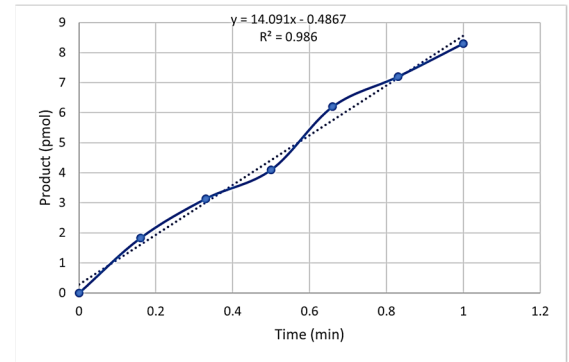

**h-TREX1 with 200 nM U5 Processed HIV-1 DNA substrate**

(k)

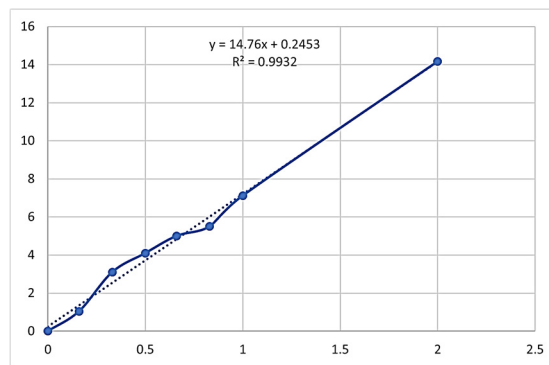

**h-TREX1 with 300 nM U5 Processed HIV-1 DNA substrate**

## Supplementary Figures

**Figure 2:** Representative Initial velocity curve analysis of m-TREX1 kinetics with U5 unprocessed and processed HIV-1 substrates

(a)

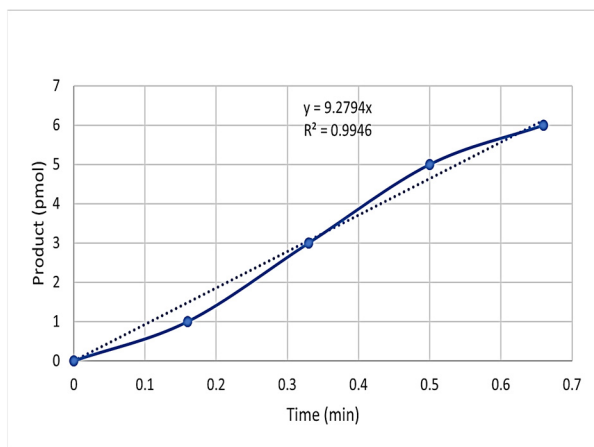

**m-TREX1 with 25 nM U5 Unprocessed HIV-1 DNA substrate**

(c)

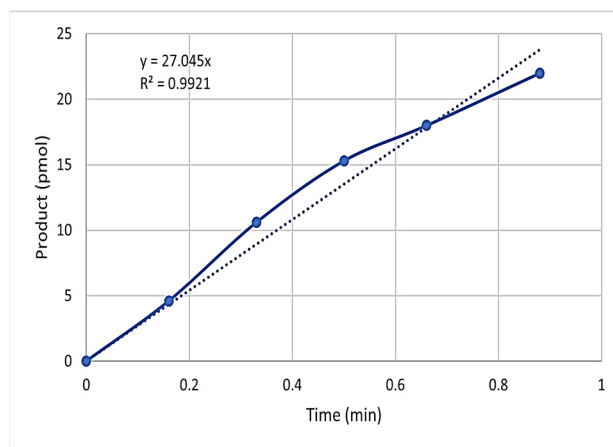

**m-TREX1 with 100 nM U5 Unprocessed HIV-1 DNA substrate**

(b)

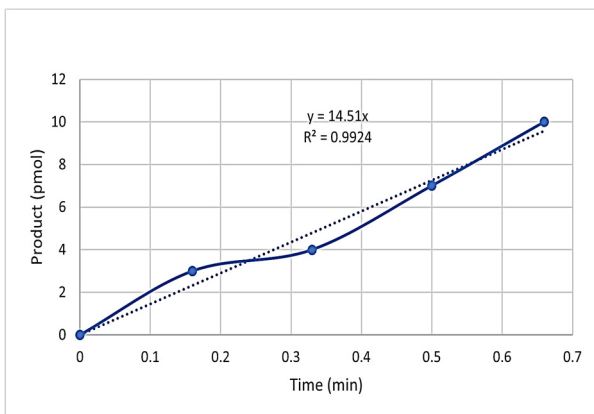

**m-TREX1 with 50 nM U5 Unprocessed HIV-1 DNA substrate**

(d)

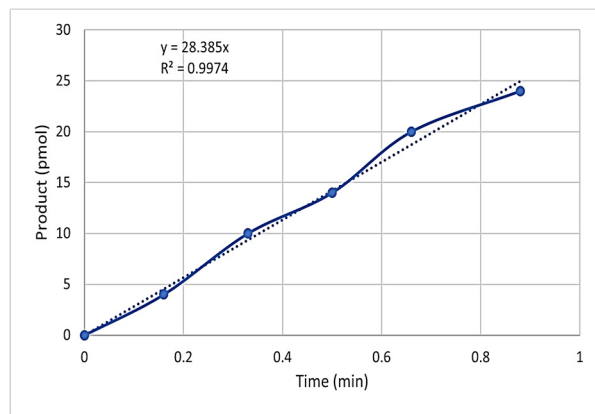

**m-TREX1 with 200 nM U5 Unprocessed HIV-1 DNA substrate**

(e)

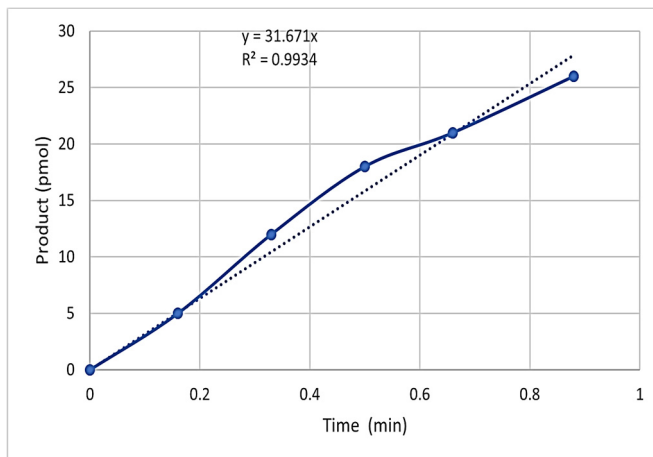

**m-TREX1 with 300 nM U5 Unprocessed HIV-1 DNA substrate**

(f)

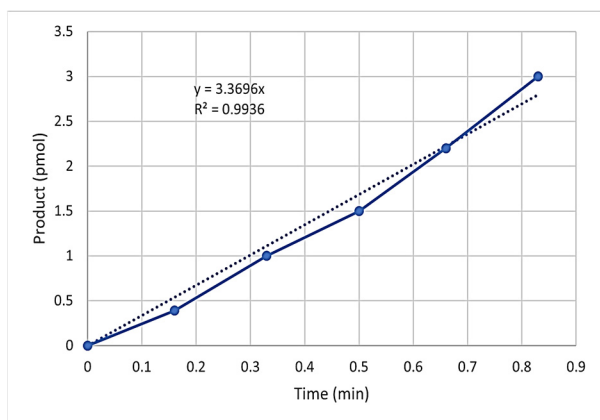

**m-TREX1 with 25 nM U5 Processed HIV-1 DNA substrate**

(h)

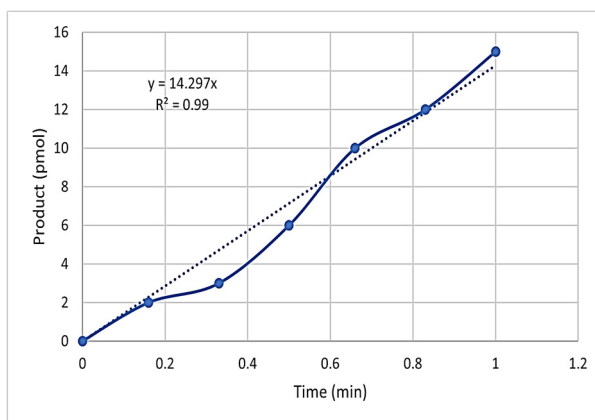

**m-TREX1 with 100 nM U5 Processed HIV-1 DNA substrate**

(g)

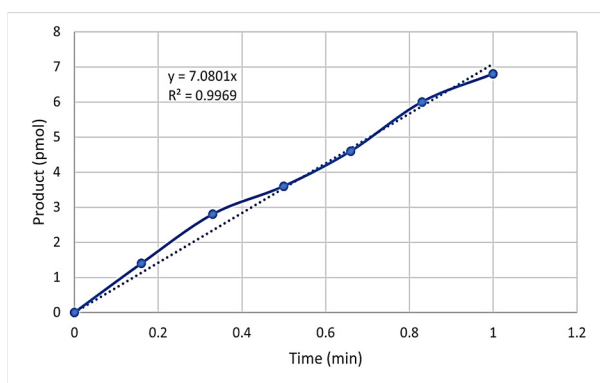

**m-TREX1 with 50 nM U5 Processed HIV-1 DNA substrate**

(i)

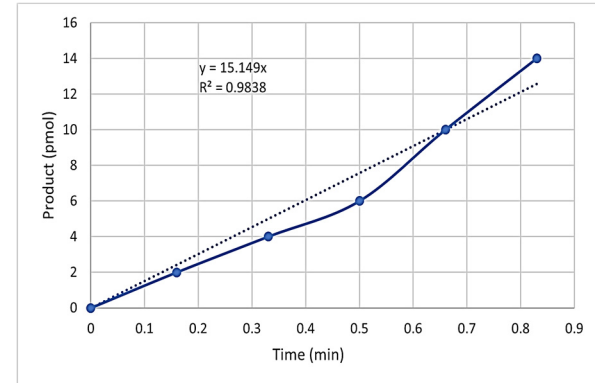

**m-TREX1 with 200 nM U5 Processed HIV-1 DNA substrate**

(j)

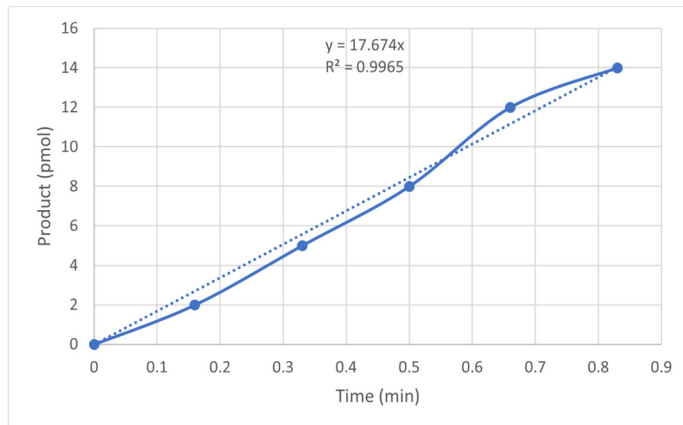

**m-TREX1 with 300 nM U5 Processed HIV-1 DNA substrate**

## Supplementary Figures

**Figure 3: Representative Initial velocity curve analysis of h-TREX1 kinetics with U3 unprocessed and processed HIV-1 substrates**

(a)

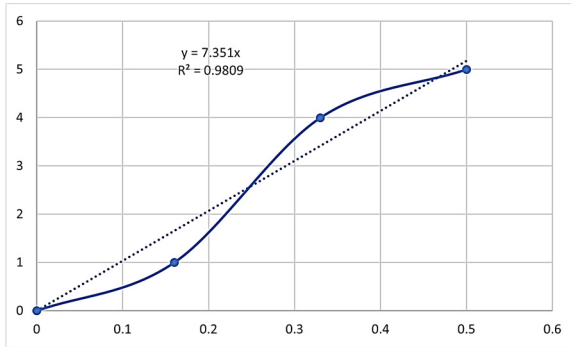

**h-TREX1 with 25 nM U3 Unprocessed HIV-1 DNA substrate**

(c)

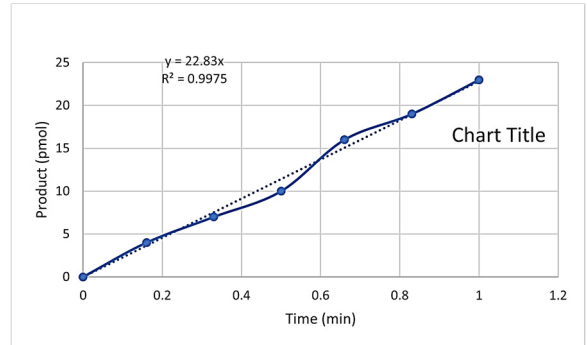

**h-TREX1 with 100 nM U3 Unprocessed HIV-1 DNA substrate**

(b)

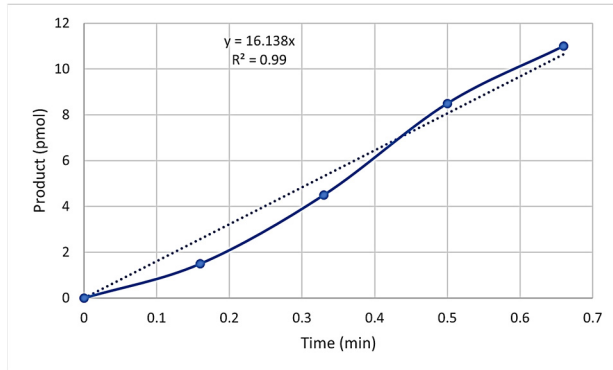

**h-TREX1 with 50 nM U3 Unprocessed HIV-1 DNA substrate**

(d)

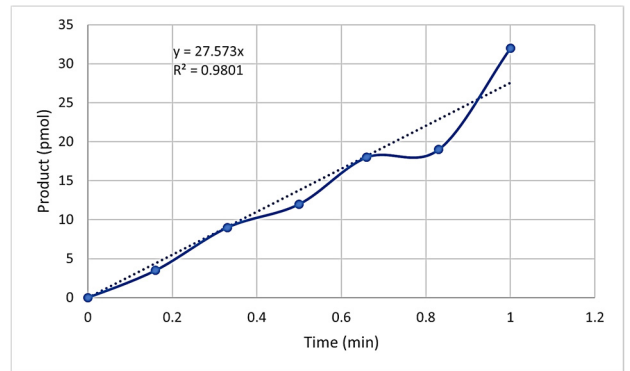

**h-TREX1 with 200 nM U3 Unprocessed HIV-1 DNA substrate**

(e)

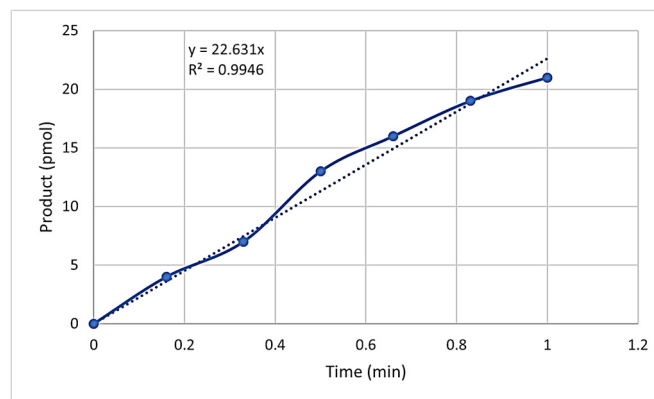

**h-TREX1 with 300 nM U3 Unprocessed HIV-1 DNA substrate**

(f)

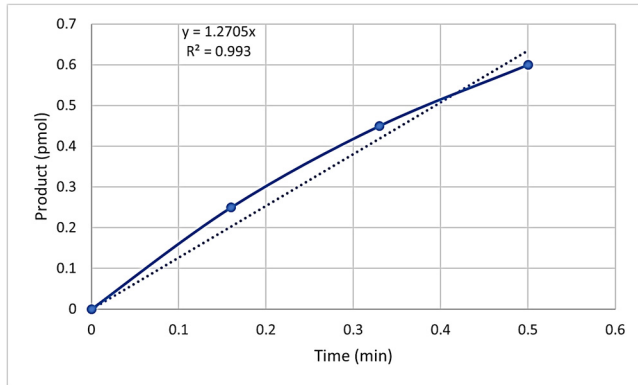

**h-TREX1 with 25 nM U3 Processed HIV-1 DNA substrate**

(h)

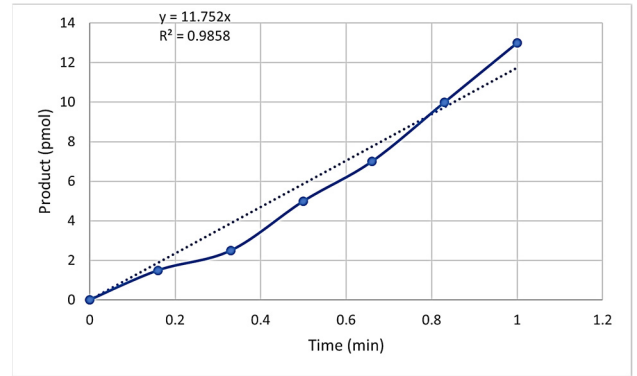

**h-TREX1 with 100 nM U3 Processed HIV-1 DNA substrate**

(g)

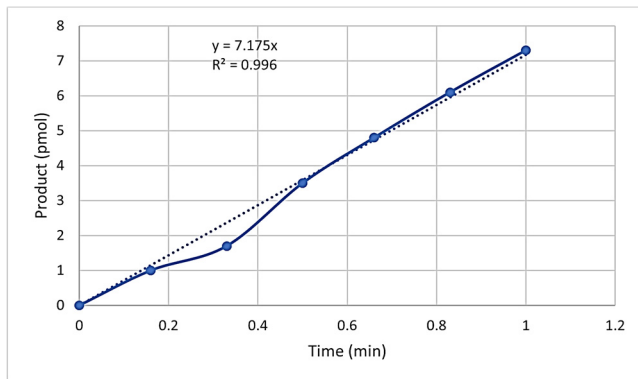

**h-TREX1 with 50 nM U3 Processed HIV-1 DNA substrate**

(i)

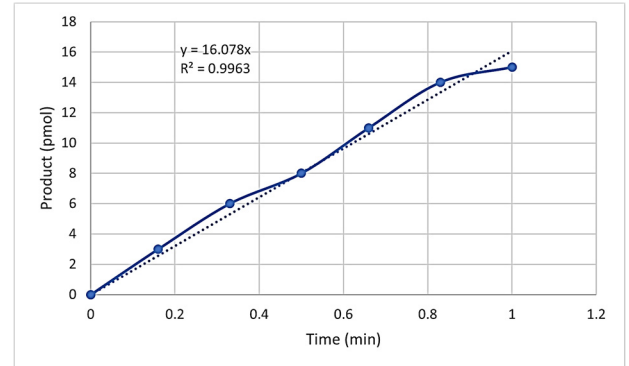

**h-TREX1 with 200 nM U3 Processed HIV-1 DNA substrate**

(j)

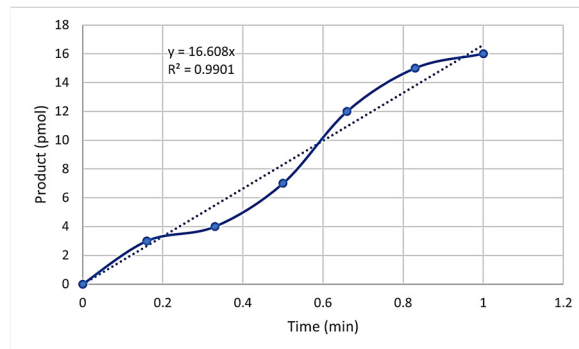

**h-TREX1 with 300 nM U3 Processed HIV-1 DNA substrate**

## Supplementary Figures

**Figure 4:** Representative Initial velocity curve analysis of m-TREX1 kinetics with U3 unprocessed HIV-1 substrates

(a)

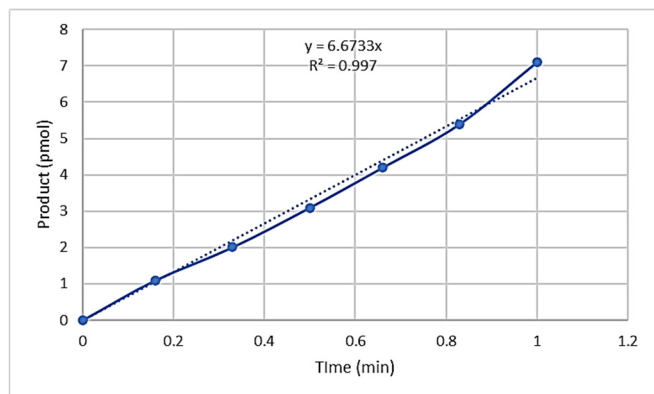

**m-TREX1 with 25 nM U3 Unprocessed HIV-1 DNA substrate**

(b)

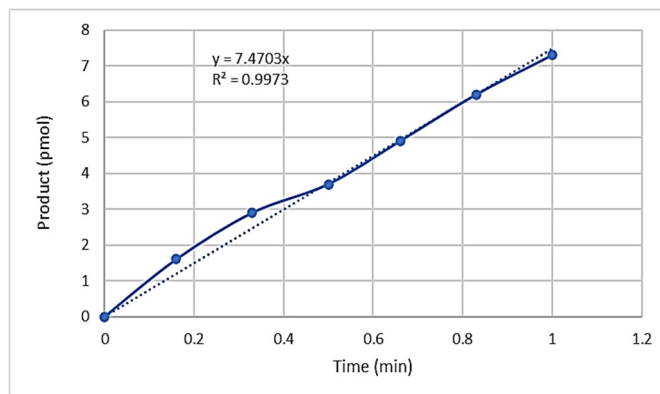

**m-TREX1 with 50 nM U3 Unprocessed HIV-1 DNA substrate**

(c)

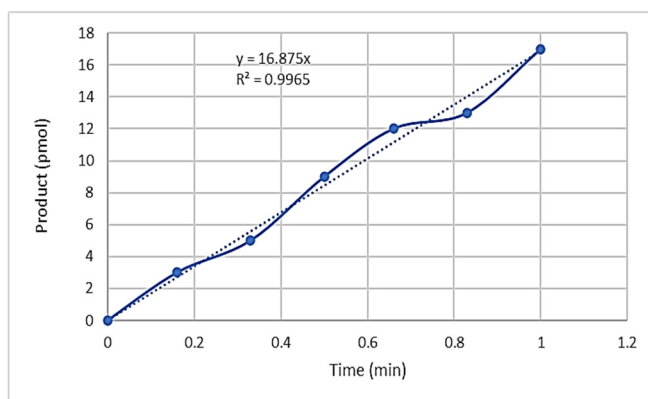

**m-TREX1 with 100 nM U3 Unprocessed HIV-1 DNA substrate**

(d)

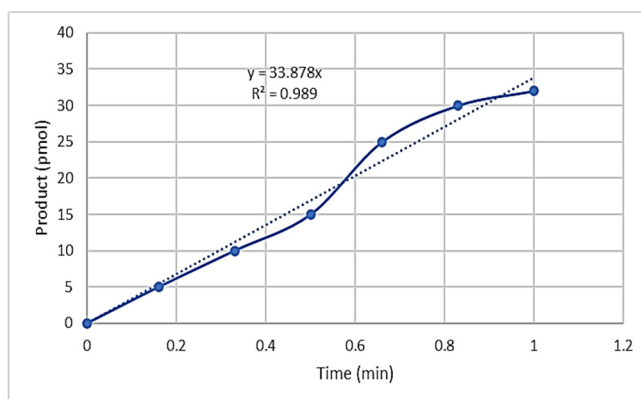

**m-TREX1 with 200 nM U3 Unprocessed HIV-1 DNA substrate**

(e)

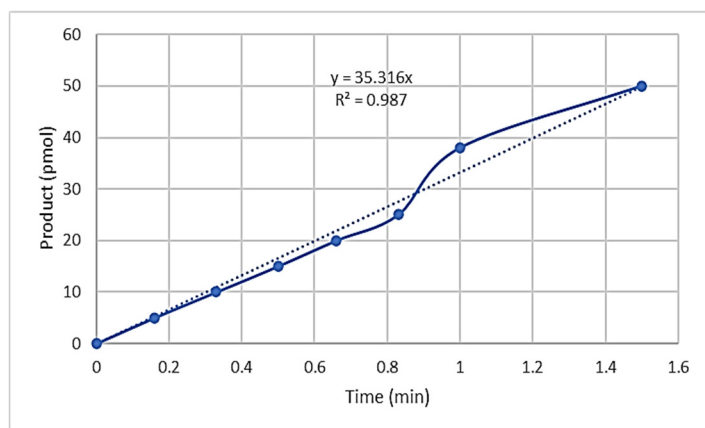

**m-TREX1 with 400 nM U3 Unprocessed HIV-1 DNA substrate**

(f)

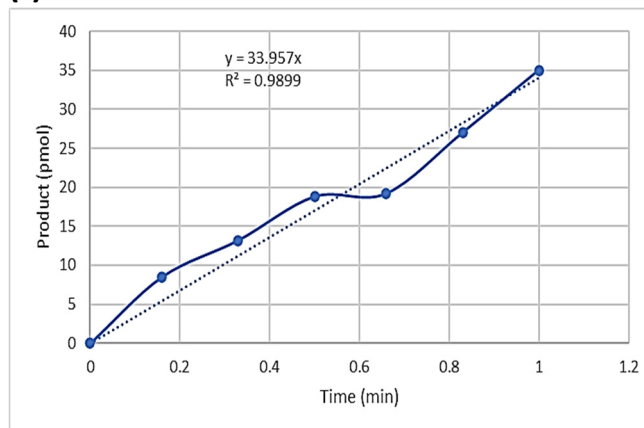

**m-TREX1 with 600 nM U3 Unprocessed HIV-1 DNA substrate**

## Supplementary Figures

**Figure 4: Representative Initial velocity curve analysis of m-TREX1 kinetics with U3 processed HIV-1 substrates**

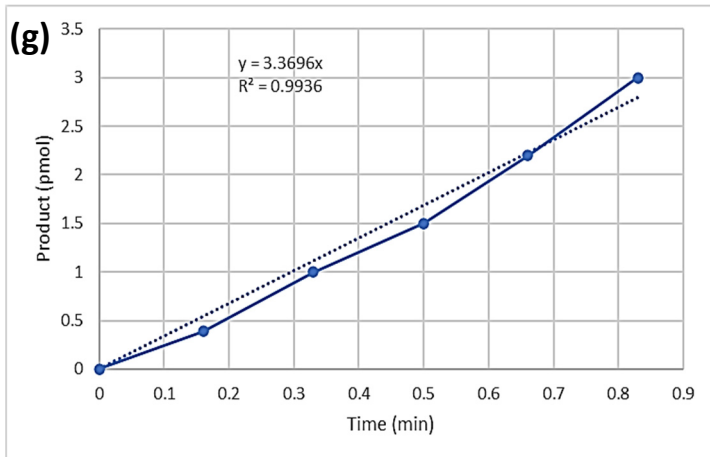

**m-TREX1 with 25 nM U3 Processed HIV-1 DNA substrate**

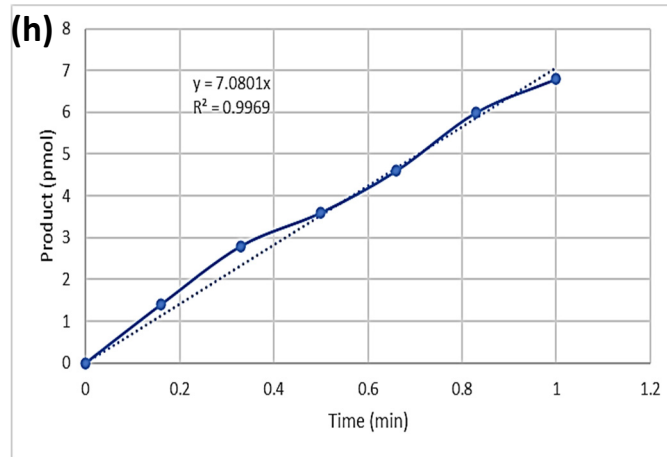

**m-TREX1 with 50 nM U3 Processed HIV-1 DNA substrate**

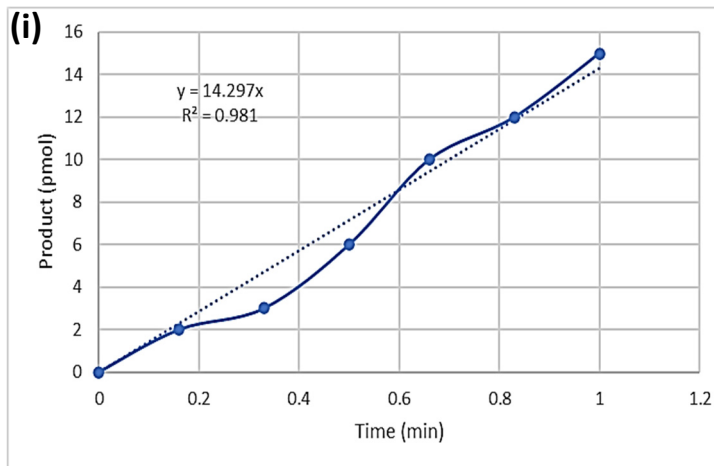

**m-TREX1 with 100 nM U3 Processed HIV-1 DNA substrate**

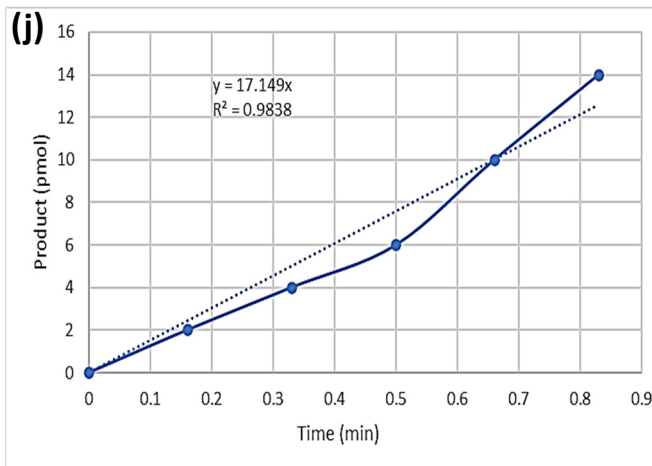

**m-TREX1 with 200 nM U3 Processed HIV-1 DNA substrate**

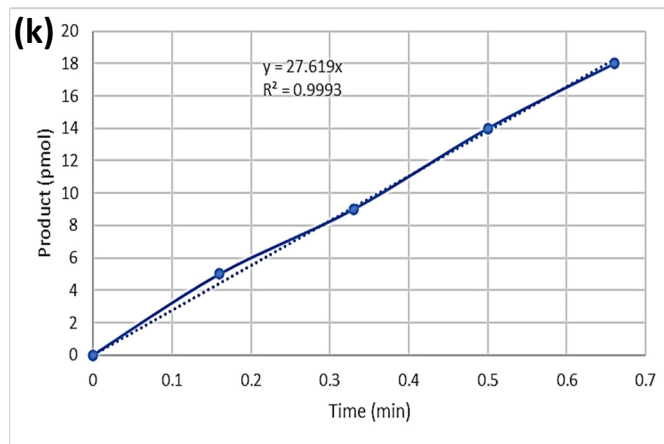

**m-TREX1 with 400 nM U3 Processed HIV-1 DNA substrate**
